# Supplementary material
Source: PubMed Central journal article supplement (PMC6944142)
Supplement: supp_7.4.E680_2019-0096-1-at.pdf [file supp_7.4.E680_2019-0096-1-at.pdf]

## Appendix 1 (as supplied by the authors): Overarching aims of mixed methods study

### Quantitative analyses

1. Administrative health data (ICES)
  - Trends in prevalence, incidence and mortality
  - Measures of diabetes control (HbA1c and lipid monitoring and control)
  - Health care utilization (access to primary care and specialists)
  - Diabetes-related emergency department visits and hospitalizations for hyper- and hypoglycemia
  - Emergency department visits, hospitalizations and medications related to cardiac disease (acute myocardial infarction, unstable angina and congestive heart failure)
  - Incidence of strokes (ischemic, hemorrhagic and transient ischemic attack), length of hospitalization, discharge to rehabilitation or long-term care, mortality at 7 days, 30 days and one year post-stroke
  - Peripheral vascular disease-related amputations and bypass surgeries
  - Diabetic retinopathy-related eye examinations and treatment
  - Dialysis, screening, follow-up monitoring, medications and nephrologist visits for kidney disease
  - Pregnancy-related outcomes, including rates of gestational diabetes, deliveries and complications, visits to comprehensive primary care physicians and specialists, types of birth and birth-related complications
2. First Nations Regional Health Survey
  - Distribution of diabetes risk factors among First Nations people living in First Nations communities in Ontario

### Qualitative study

Interviews in First Nations communities to describe the lived experience of First Nations people newly diagnosed with diabetes, those with a first episode complication and those living with multiple co-morbidities
